# Supplementary material for: Draft Genomes of Two Artocarpus Plants, Jackfruit (A. heterophyllus) and Breadfruit (A. altilis)
Source: PubMed Central journal article supplement (PMC7017358; doi:10.3390/genes11010027), 2019-12-24
Supplement: genes-11-00027-s001.pdf [file genes-11-00027-s001.pdf]

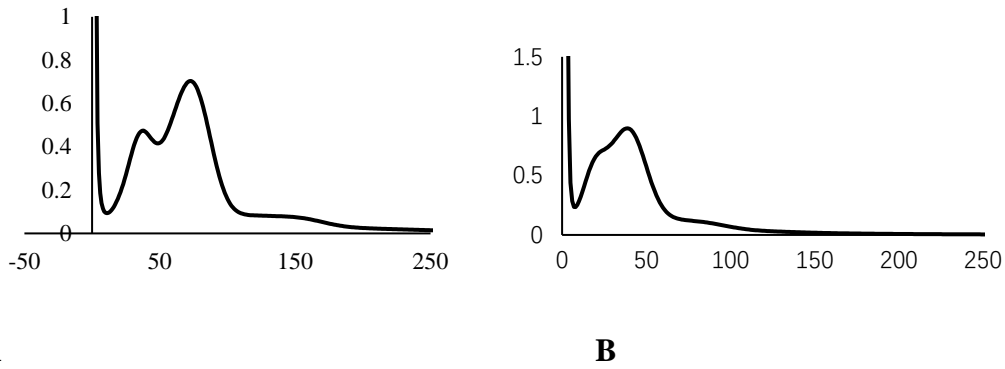

**Figure S1: K-mer (K=17) analysis of the two genomes.** The X-axis is depth; the y-axis represents the frequency. The left peak is the heterozygous peak and the right peak was the homozygous peak. A: *A. altilis*, B: *A. heterophyllus*.

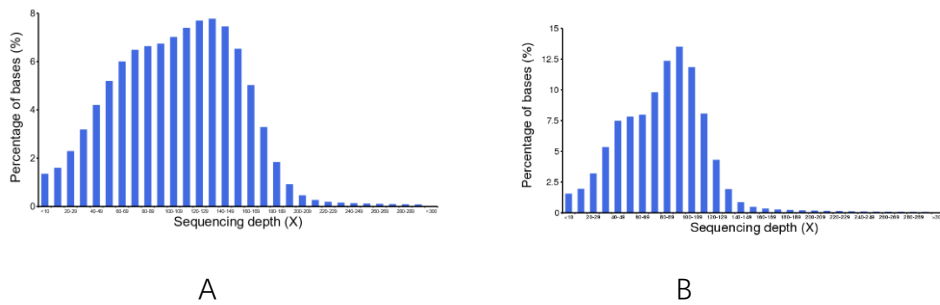

**Figure S2: Distribution of sequencing depth of the assembly data.** The X-axis is the depth and the y-axis show the percentage of bases at each depth. The results show that <1% of bases have a sequencing depth less than 10. A: *A. altilis*, B: *A. heterophyllus*.

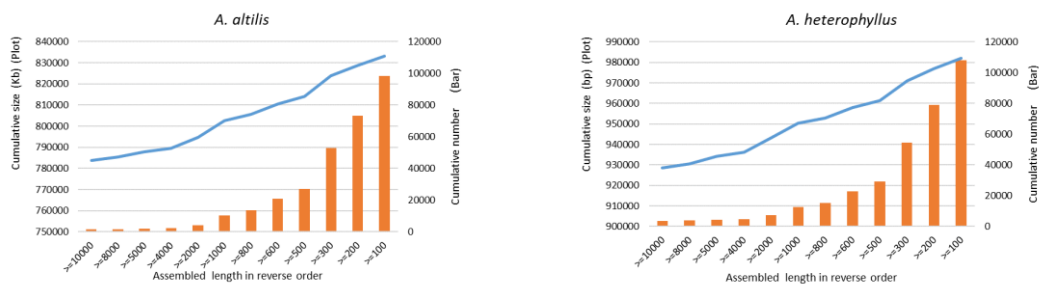

**Figure S3: Distribution of the length and number of the scaffold in two species.** The blue lines show the size, and the orange bars show the number.

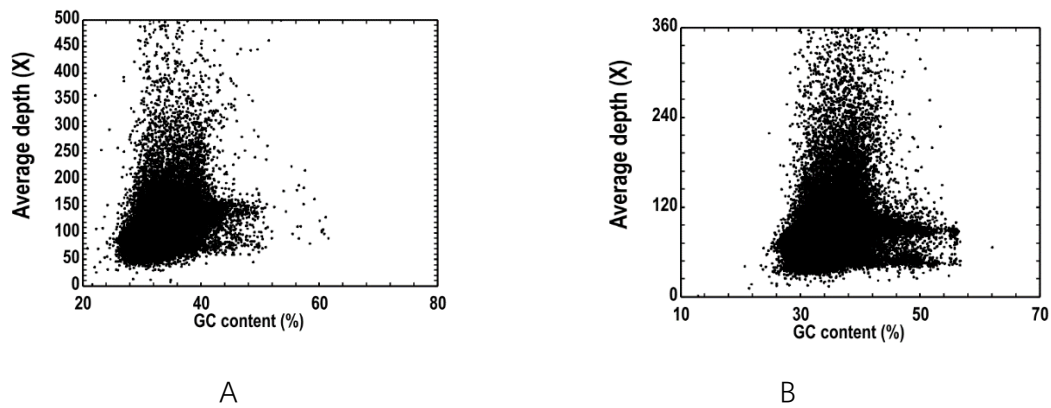

**Figure S4: The distribution of GC content.** The GC content and the average depth were calculated from 10 kb non-overlapping sliding windows. The distribution pattern of GC content indicates a relatively pure single genomic sample without contamination and no GC bias. A: *A. altilis*, B: *A. heterophyllus*.

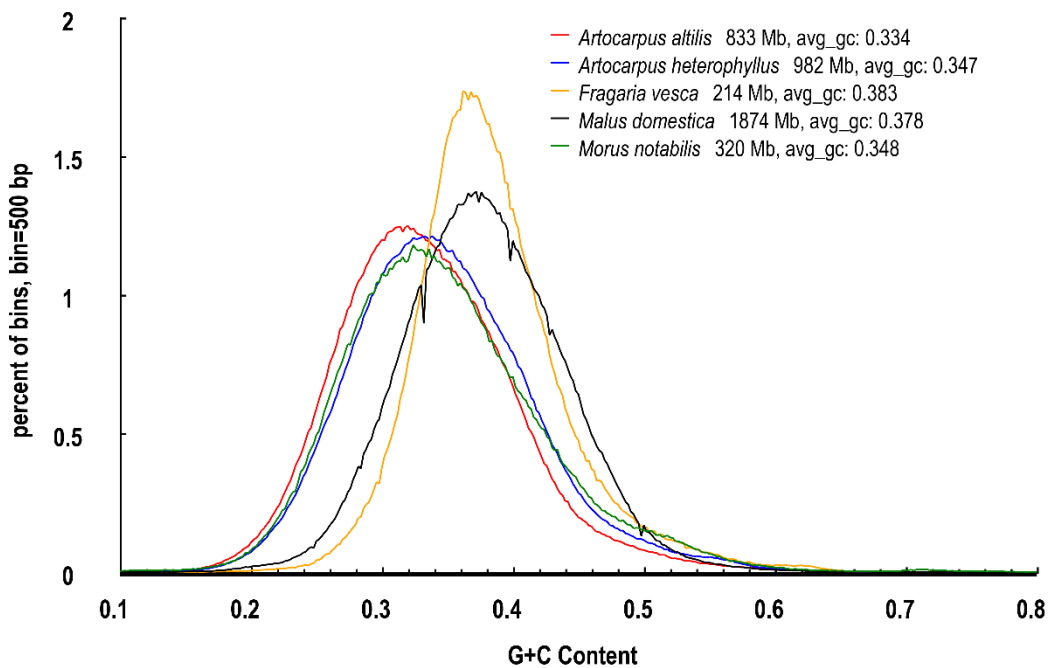

**Figure S5: Comparison of GC content across closely related species.** The *A. altilis*, *A. heterophyllus* and *M. notabilis* belong to the same family, and they show the same peaks of GC content.

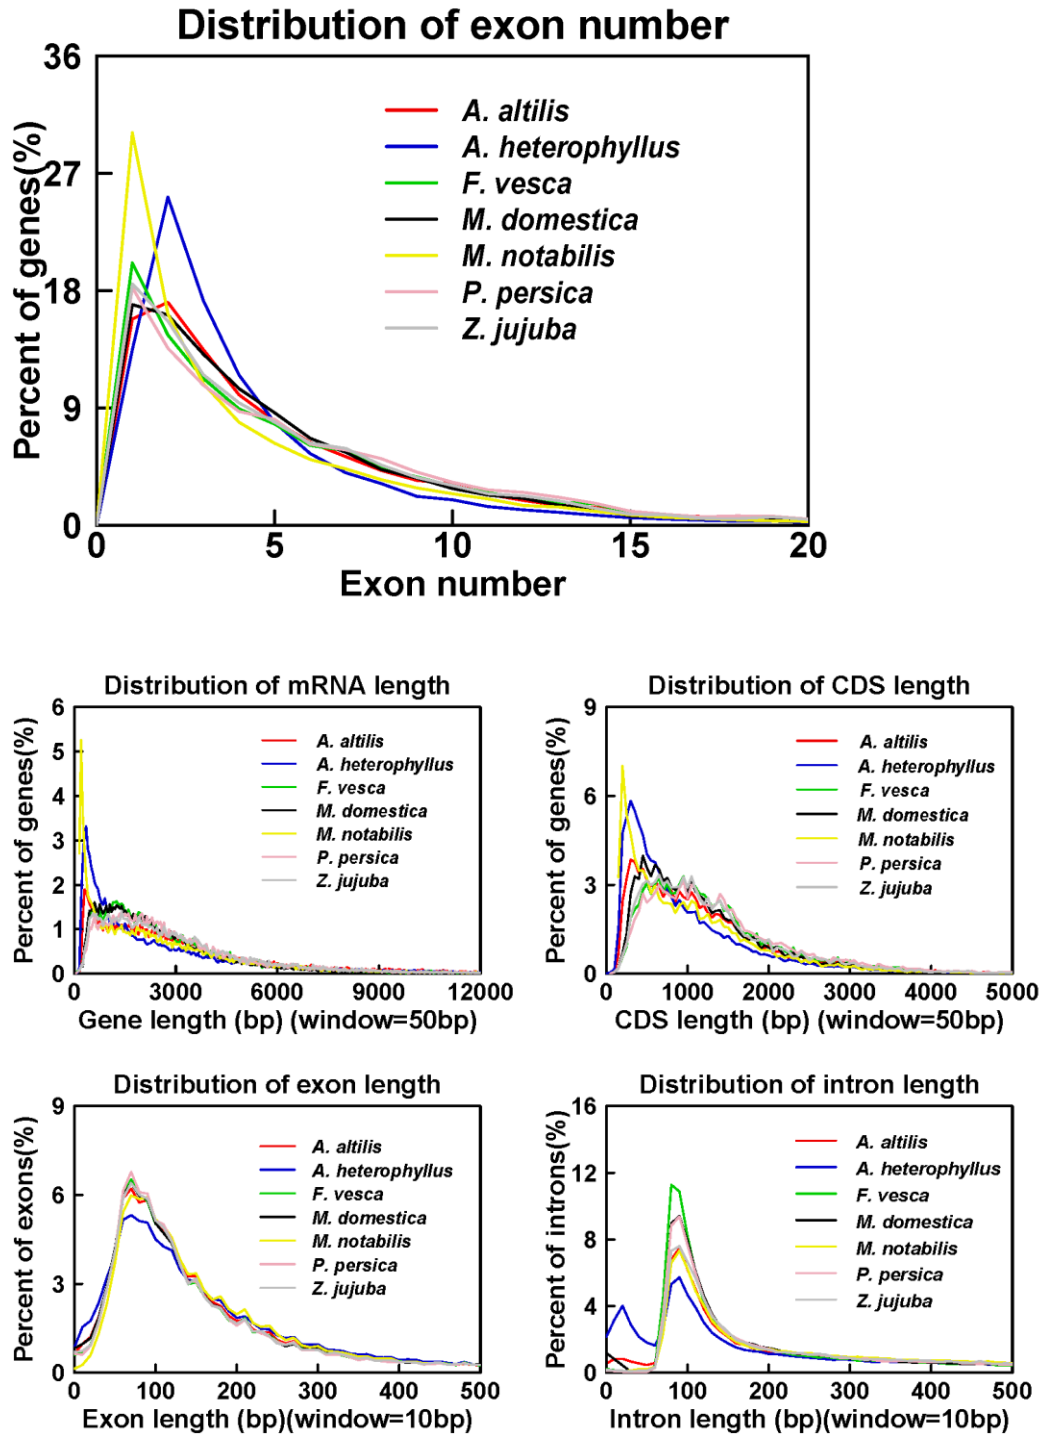

**Figure S6:** Statistics of gene models in *A. altilis*, *A. heterophyllus*, *F. vesca*, *M. domestica*, *M. notabilis*, *Prunus persica* and *Ziziphus jujuba*.

**A**Inter-genomic comparison: *A. altilis* vs *A. heterophyllus* (3,132 gene pairs)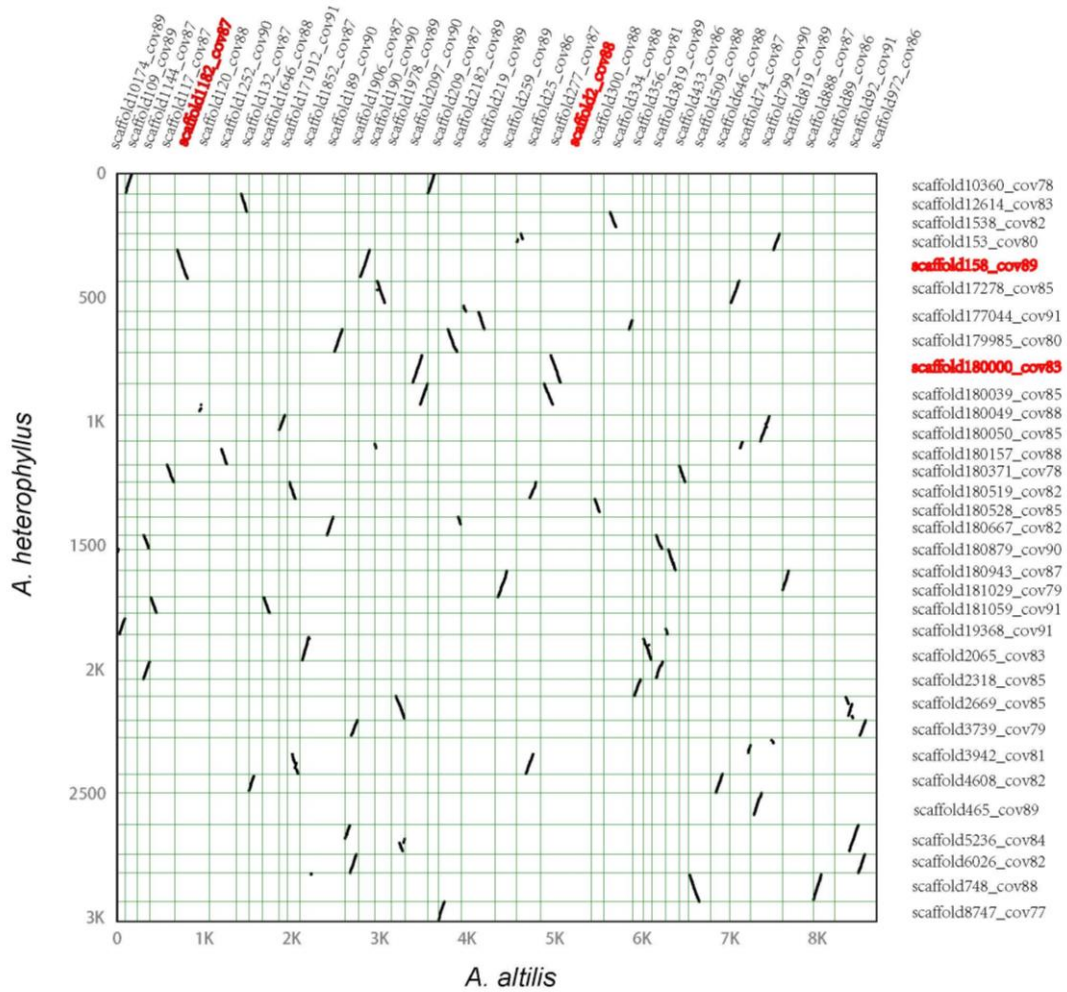**B**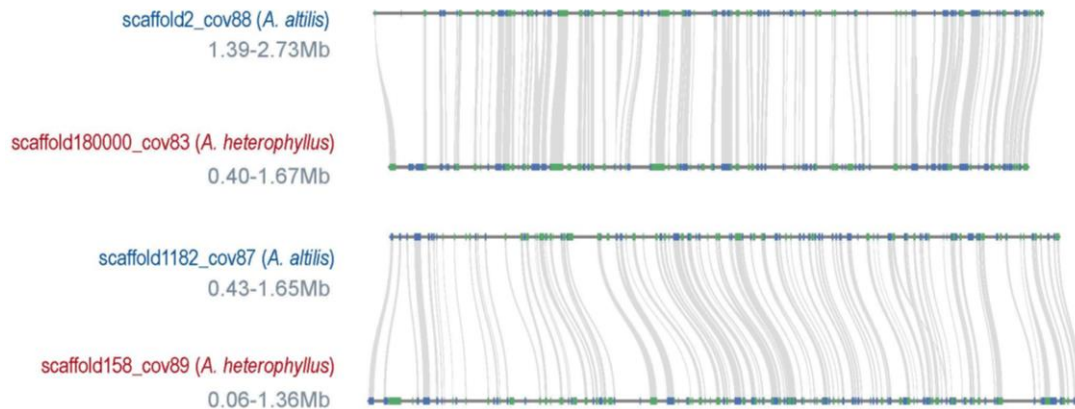

**Figure S7:** (A) The collinearity between two species. The X-axis is the *A. heterophyllus*; Y-axis is the *A. altilis*. (B) Preservation of co-localized genes on the two largest overlapping orthologous scaffolds of *A. altilis* and *A. heterophyllus*.

**Table S1.** Statistics of the raw and clean data of DNA sequencing. Clean data were obtained by filtering raw data as described in the article. The sequencing depth calculated based on a genome size of 811, 1005 Mb of *A. altilis* and *A. heterophyllus*, respectively.

| Species                 | Library | Read insert length (bp) | Raw data         |                   |           | Clean data       |                   |           |
|-------------------------|---------|-------------------------|------------------|-------------------|-----------|------------------|-------------------|-----------|
|                         |         |                         | base number (bp) | Reads number (bp) | Depth (X) | base number (bp) | Reads number (bp) | Depth (X) |
| <i>A. altilis</i>       | 170     | PE100                   | 27,997,546,200   | 279,975,462       | 34.51     | 24,457,319,840   | 257,445,472       | 30.15     |
|                         | 350     | PE100                   | 37,756,156,600   | 377,561,566       | 46.54     | 32,314,250,380   | 323,142,504       | 39.83     |
|                         | 500     | PE100                   | 17,016,336,900   | 170,163,369       | 20.98     | 14,394,991,000   | 143,949,910       | 17.74     |
|                         | 800     | PE100                   | 27,820,793,600   | 278,207,936       | 34.29     | 23,427,277,780   | 234,272,778       | 28.88     |
|                         | 2000    | PE100                   | 29,259,701,000   | 292,597,010       | 36.07     | 11,676,799,030   | 116,767,990       | 14.39     |
|                         | 6000    | PE100                   | 26,886,185,600   | 268,861,856       | 33.14     | 10,018,166,480   | 100,181,665       | 12.35     |
|                         | 10000   | PE100                   | 34,525,749,400   | 345,257,494       | 42.56     | 10,295,921,210   | 102,959,212       | 12.69     |
|                         | 20000   | PE100                   | 25,992,313,200   | 259,923,132       | 32.04     | 3,530,699,890    | 35,306,999        | 4.35      |
|                         | Total   |                         | 227,254,782,500  | 2,272,547,825     | 280.13    | 130,115,425,610  | 1,314,026,530     | 160.39    |
| <i>A. heterophyllus</i> | 170     | PE100                   | 38,595,699,600   | 385,956,996       | 38.38     | 33,017,200,030   | 330,172,000       | 32.83     |
|                         | 350     | PE100                   | 32,428,208,400   | 324,282,084       | 32.25     | 27,992,453,380   | 279,924,534       | 27.84     |
|                         | 500     | PE100                   | 14,831,029,800   | 148,310,298       | 14.75     | 12,425,626,520   | 124,256,265       | 12.36     |
|                         | 800     | PE100                   | 22,618,262,000   | 226,182,620       | 22.49     | 19,410,382,710   | 194,103,827       | 19.30     |
|                         | 2000    | PE100                   | 76,821,363,600   | 768,213,636       | 76.39     | 36,971,268,180   | 369,712,682       | 36.77     |
|                         | 6000    | PE100                   | 32,718,039,600   | 327,180,396       | 32.54     | 14,483,081,550   | 144,830,816       | 14.40     |
|                         | 10000   | PE100                   | 22,875,623,600   | 228,756,236       | 22.75     | 4,204,951,180    | 42,049,512        | 4.18      |
|                         | 20000   | PE100                   | 32,777,398,400   | 327,773,984       | 32.59     | 4,311,498,050    | 43,114,981        | 4.29      |
|                         | Total   |                         | 273,665,625,000  | 2,736,656,250     | 272.14    | 152,816,461,600  | 1,528,164,616     | 151.96    |

**Table S2.** Summary statistics of the transcriptome data.

| Species                 | Abbreviation | Raw data         |                   | Clean data       |                   | Sample           |
|-------------------------|--------------|------------------|-------------------|------------------|-------------------|------------------|
|                         |              | Base number (bp) | Reads number (bp) | Base number (bp) | Reads number (bp) |                  |
| <i>A. altilis</i>       | AALBd        | 4,629,731,282    | 19,131,121        | 611,897,508      | 2,886,309         | Leaf bud         |
|                         | AAYL         | 11,655,613,464   | 48,163,692        | 1,117,701,948    | 5,272,179         | Young leaf       |
|                         | AASL         | 10,178,838,956   | 42,061,318        | 1,024,350,292    | 4,831,841         | Semi mature leaf |
|                         | AAML         | 19,051,406,682   | 78,724,821        | 2,635,339,776    | 12,430,848        | Mature leaf      |
|                         | AAST         | 8,529,531,032    | 35,245,996        | 916,693,088      | 4,324,024         | stem             |
|                         | Total        | 54,045,121,416   | 223,326,948       | 6,305,982,612    | 29,745,201        |                  |
| <i>A. heterophyllus</i> | AHLB         | 1,174,736,970    | 9,708,570         | 20,728,520       | 180,248           | Leaf bud         |
|                         | AHYL         | 11,510,346,914   | 95,126,834        | 194,000,860      | 1,686,964         | Young leaf       |
|                         | AHML         | 928,769,616      | 7,675,782         | 66,734,270       | 580,298           | Mature leaf      |
|                         | AHSL         | 13,289,054,416   | 109,826,896       | 200,927,310      | 1,747,194         | Semi mature leaf |
|                         | AHRT         | 2,612,876,178    | 21,594,018        | 232,498,720      | 2,021,728         | Roots            |
|                         | AHSDL        | 12,200,805,826   | 100,833,106       | 1,097,277,560    | 9,541,544         | Seedling         |
|                         | AHS          | 6,078,062,078    | 50,231,918        | 1,001,884,60     | 871,204           | Stem             |
|                         | Total        | 47,794,651,998   | 394,997,124       | 1,812,167,240    | 16,629,180        |                  |

**Table S3.** Estimation of the genome size based on K-mer statistics.

| Species                 | Kmer value | Kmer number    | Peak depth(X) | Genome size (Mb) | Used bases (Gb) | Used reads (Mb) | Depth (X) |
|-------------------------|------------|----------------|---------------|------------------|-----------------|-----------------|-----------|
| <i>A. altilis</i>       | 17         | 59,221,955,980 | 73            | 811.26           | 70.08           | 678.89          | 44.96     |
| <i>A. heterophyllus</i> | 17         | 39,218,751,230 | 39            | 1,005.61         | 46.29           | 442.23          | 46.03     |

**Table S4.** BUSCO evaluation of the annotated protein-coding genes in *A. altilis* and *A. heterophyllus*.

| BUSCOs               | <i>A. altilis</i> |       | <i>A. heterophyllus</i> |       |
|----------------------|-------------------|-------|-------------------------|-------|
|                      | N                 | P (%) | N                       | P (%) |
| Complete BUSCOs      | 1,319             | 91.6  | 1,288                   | 89.5  |
| Complete single-copy | 977               | 67.8  | 885                     | 61.5  |
| Complete duplicated  | 342               | 23.8  | 403                     | 28.0  |
| Fragmented           | 32                | 2.2   | 30                      | 2.1   |
| Missing              | 89                | 6.2   | 122                     | 8.4   |

**Table S5.** Analysis of gene families of different species.

| Species                 | Genes number | Genes in families | Unclustered genes | Family number | Unique families | Average genes per family |
|-------------------------|--------------|-------------------|-------------------|---------------|-----------------|--------------------------|
| <i>A. thaliana</i>      | 26,637       | 23,011            | 3,626             | 12,620        | 769             | 1.8                      |
| <i>A. altilis</i>       | 33,986       | 27,354            | 6,632             | 15,614        | 136             | 1.8                      |
| <i>A. heterophyllus</i> | 35,845       | 28,969            | 6,876             | 15,768        | 242             | 1.8                      |
| <i>F. vesca</i>         | 34,301       | 26,703            | 7,598             | 15,188        | 1,427           | 1.8                      |
| <i>M. domestica</i>     | 61,721       | 45,647            | 16,074            | 17,385        | 3,352           | 2.6                      |
| <i>M. notabilis</i>     | 27,085       | 20,805            | 6,280             | 14,955        | 567             | 1.4                      |
| <i>P. mume</i>          | 31,128       | 25,702            | 5,426             | 16,060        | 566             | 1.6                      |
| <i>P. persica</i>       | 28,701       | 25,385            | 3,316             | 15,654        | 231             | 1.6                      |
| <i>Z. jujuba</i>        | 36,942       | 34,050            | 2,892             | 14,170        | 755             | 2.4                      |

**Table S6.** Enriched GO terms (level 3) of genes in families with expansion.

| Species           | GO ID      | GO Term                | Type               | P-value  | Number of genes |
|-------------------|------------|------------------------|--------------------|----------|-----------------|
| <i>A. altilis</i> | GO:0036094 | small molecule binding | Molecular Function | 5.74E-27 | 862             |
|                   | GO:0043167 | ion binding            | Molecular Function | 4.10E-22 | 1,239           |

|                      |            |                                           |                    |          |       |
|----------------------|------------|-------------------------------------------|--------------------|----------|-------|
|                      | GO:0016740 | transferase activity                      | Molecular Function | 1.43E-11 | 763   |
|                      | GO:0097159 | organic cyclic compound binding           | Molecular Function | 2.28E-07 | 1,274 |
|                      | GO:1901363 | heterocyclic compound binding             | Molecular Function | 2.28E-07 | 1,274 |
|                      | GO:0001871 | pattern binding                           | Molecular Function | 0.000227 | 13    |
|                      | GO:0005515 | protein binding                           | Molecular Function | 0.003724 | 630   |
|                      | GO:0016049 | cell growth                               | Biological Process | 1.21E-06 | 12    |
|                      | GO:0044700 | single organism signaling                 | Biological Process | 0.000533 | 72    |
|                      | GO:0022857 | transmembrane transporter activity        | Molecular Function | 1.45E-17 | 332   |
|                      | GO:0022892 | substrate-specific transporter activity   | Molecular Function | 1.53E-09 | 151   |
|                      | GO:0016491 | oxidoreductase activity                   | Molecular Function | 8.81E-07 | 547   |
|                      | GO:0036094 | small molecule binding                    | Molecular Function | 2.11E-06 | 983   |
|                      | GO:0038023 | signaling receptor activity               | Molecular Function | 1.00E-05 | 27    |
|                      | GO:0048037 | cofactor binding                          | Molecular Function | 0.000102 | 164   |
|                      | GO:0019208 | phosphatase regulator activity            | Molecular Function | 0.000673 | 15    |
|                      | GO:0016829 | lyase activity                            | Molecular Function | 0.002478 | 86    |
|                      | GO:0030246 | carbohydrate binding                      | Molecular Function | 0.006209 | 63    |
|                      | GO:0005515 | protein binding                           | Molecular Function | 0.008019 | 892   |
| A.                   | GO:0003682 | chromatin binding                         | Molecular Function | 0.014389 | 17    |
| <i>heterophyllus</i> | GO:0044703 | multi-organism reproductive process       | Biological Process | 1.28E-38 | 96    |
|                      | GO:0044706 | multi-multicellular organism process      | Biological Process | 1.28E-38 | 96    |
|                      | GO:0048610 | cellular process involved in reproduction | Molecular Function | 2.68E-37 | 97    |
|                      | GO:0022414 | reproductive process                      | Biological Process | 3.57E-36 | 96    |
|                      | GO:0044707 | single-multicellular organism process     | Biological Process | 2.67E-27 | 100   |
|                      | GO:0044700 | single organism signaling                 | Biological Process | 2.31E-14 | 149   |
|                      | GO:0044763 | single-organism cellular process          | Biological Process | 3.69E-11 | 831   |
|                      | GO:0051716 | cellular response to stimulus             | Biological Process | 1.07E-08 | 180   |
|                      | GO:0044765 | single-organism transport                 | Biological Process | 5.90E-06 | 438   |



|            |                                              |                    |          |     |
|------------|----------------------------------------------|--------------------|----------|-----|
| GO:0044710 | single-organism metabolic process            | Biological Process | 2.90E-05 | 739 |
| GO:0051234 | establishment of localization                | Biological Process | 0.000225 | 493 |
| GO:0009605 | response to external stimulus                | Biological Process | 0.002533 | 7   |
| GO:0051606 | detection of stimulus                        | Biological Process | 0.007408 | 5   |
| GO:0031224 | intrinsic to membrane                        | Cellular Component | 4.87E-06 | 326 |
| GO:0008287 | protein serine/threonine phosphatase complex | Cellular Component | 0.001066 | 13  |
| GO:0044425 | membrane part                                | Cellular Component | 0.003813 | 362 |
| GO:0044421 | extracellular region part                    | Cellular Component | 0.007408 | 5   |

**Table S7.** Enriched pathways of genes in families with expansion.

| <b>Species</b>    | <b>Pathway ID</b> | <b>KEGG description</b>                     | <b>Number of genes</b> | <b>P-value (&lt;=0.05)</b> |
|-------------------|-------------------|---------------------------------------------|------------------------|----------------------------|
| <i>A. attilis</i> | ko04626           | Plant-pathogen interaction                  | 265                    | 1.33679E-15                |
|                   | ko04144           | Endocytosis                                 | 127                    | 1.55321E-11                |
|                   | ko04146           | Peroxisome                                  | 79                     | 7.69212E-10                |
|                   | ko04141           | Protein processing in endoplasmic reticulum | 179                    | 1.75141E-06                |
|                   | ko03040           | Spliceosome                                 | 150                    | 9.27025E-06                |
|                   | ko00300           | Lysine biosynthesis                         | 16                     | 6.66998E-05                |
|                   | ko00450           | Selenocompound metabolism                   | 22                     | 0.000214547                |
|                   | ko00072           | Synthesis and degradation of ketone bodies  | 8                      | 0.000814513                |
|                   | ko00190           | Oxidative phosphorylation                   | 74                     | 0.002151087                |
|                   | ko00195           | Photosynthesis                              | 34                     | 0.006288728                |
|                   | ko00260           | Glycine, serine and threonine metabolism    | 44                     | 0.00738846                 |
|                   | ko00564           | Glycerophospholipid metabolism              | 50                     | 0.007535005                |
|                   | ko03060           | Protein export                              | 28                     | 0.007913934                |
|                   | ko03050           | Proteasome                                  | 30                     | 0.008523159                |
|                   | ko03430           | Mismatch repair                             | 88                     | 1.09E-14                   |

|                      |         |                                                     |     |          |
|----------------------|---------|-----------------------------------------------------|-----|----------|
| A.                   | ko04626 | Plant-pathogen interaction                          | 339 | 1.9E-13  |
| <i>heterophyllus</i> | ko03030 | DNA replication                                     | 98  | 6E-13    |
|                      | ko03440 | Homologous recombination                            | 84  | 1.28E-12 |
|                      | ko00380 | Tryptophan metabolism                               | 40  | 3.05E-08 |
|                      | ko01110 | Biosynthesis of secondary metabolites               | 811 | 1.21E-07 |
|                      | ko03420 | Nucleotide excision repair                          | 92  | 1.64E-07 |
|                      | ko00908 | Zeatin biosynthesis                                 | 59  | 2.94E-06 |
|                      | ko00941 | Flavonoid biosynthesis                              | 90  | 7.46E-06 |
|                      | ko00052 | Galactose metabolism                                | 80  | 2.83E-05 |
|                      | ko04712 | Circadian rhythm - plant                            | 78  | 4.5E-05  |
|                      | ko03040 | Spliceosome                                         | 185 | 5.32E-05 |
|                      | ko00940 | Phenylpropanoid biosynthesis                        | 189 | 5.41E-05 |
|                      | ko00903 | Limonene and pinene degradation                     | 36  | 6.01E-05 |
|                      | ko00620 | Pyruvate metabolism                                 | 85  | 7.13E-05 |
|                      | ko00130 | Ubiquinone and other terpenoid-quinone biosynthesis | 53  | 0.000353 |
|                      | ko04144 | Endocytosis                                         | 136 | 0.00072  |
|                      | ko00604 | Glycosphingolipid biosynthesis - ganglio series     | 31  | 0.000844 |
|                      | ko02010 | ABC transporters                                    | 74  | 0.000855 |

---

**Table S8. The gene list of starch biosynthesis in *Glycine max.***

| Category | ID in <i>Glycine max</i> |
|----------|--------------------------|
| AGPL     | Glyma.04G011900          |
| AGPL     | Glyma.04G030300          |
| AGPL     | Glyma.06G011700          |
| AGPL     | Glyma.06G030400          |
| AGPL     | Glyma.11G116600          |
| AGPL     | Glyma.12G042400          |
| AGPL     | Glyma.17G252500          |
| AGPL     | Glyma.19G223100          |
| AGPS     | Glyma.02G304500          |
| AGPS     | Glyma.14G009300          |

|      |                 |
|------|-----------------|
| BE   | Glyma.03G192300 |
| BE   | Glyma.04G017700 |
| BE   | Glyma.06G018000 |
| BE   | Glyma.19G192800 |
| DPE  | Glyma.03G121100 |
| DPE  | Glyma.04G219500 |
| DPE  | Glyma.06G146400 |
| DPE  | Glyma.19G125800 |
| GBSS | Glyma.07G049900 |
| GBSS | Glyma.20G218100 |
| ISA  | Glyma.03G151200 |
| ISA  | Glyma.06G100600 |
| ISA  | Glyma.08G028400 |
| ISA  | Glyma.19G153700 |
| PHOH | Glyma.08G334000 |
| PHOH | Glyma.13G057800 |
| PHOH | Glyma.13G235600 |
| PHOH | Glyma.18G067200 |
| PHOH | Glyma.19G028400 |
| PHOH | Glyma.20G026700 |
| PUL  | Glyma.10G197000 |
| SS   | Glyma.04G235200 |
| SS   | Glyma.05G127800 |
| SS   | Glyma.06G129400 |
| SS   | Glyma.07G260500 |
| SS   | Glyma.08G082600 |
| SS   | Glyma.13G062700 |
| SS   | Glyma.13G204700 |
| SS   | Glyma.15G108000 |
| SS   | Glyma.19G022900 |

---
